# Supplementary material for: Development of a robust tool to extract Mulliken and Löwdin charges from plane waves and its application to solid-state materials
Source: Royal Society of Chemistry journal article supplement (doi:10.1039/c9ra05190b), 2019-01-01
Supplement: c9ra05190b1.pdf [file c9ra05190b1.pdf]

## Supplementary Information

### **Development of a Robust Tool to Extract Mulliken and Löwdin Charges from Plane Waves and its Application to Solid-State Materials**

Christina Ertural<sup>a</sup>, Simon Steinberg<sup>a</sup> and Richard Dronskowski<sup>a,b,c\*</sup>

<sup>a</sup>*Institute of Inorganic Chemistry and <sup>b</sup>Jülich-Aachen Research Alliance (JARA-FIT and –HPC), RWTH Aachen University, Landoltweg 1, D-52056 Aachen, Germany*

<sup>c</sup>*Hoffmann Institute of Advanced Materials, Shenzhen Polytechnic, 7098 Liuxian Blvd, Nanshan District, Shenzhen, China*

**Table S1.** Mulliken and Löwdin charges of [NaCl] and [CsCl] type alkaline halides compared with Bader charges and charges expected from the Zintl concept. All charges in units of  $e$ .

| Compound | Element | Zintl | Mulliken charge | Löwdin charge | Bader charge |
|----------|---------|-------|-----------------|---------------|--------------|
| NaF      | Na      | +1    | +0.81           | +0.77         | +0.85        |
|          | F       | -1    | -0.81           | -0.77         | -0.85        |
| NaCl     | Na      | +1    | +0.78           | +0.67         | +0.86        |
|          | Cl      | -1    | -0.78           | -0.67         | -0.86        |
| NaBr     | Na      | +1    | +0.78           | +0.65         | +0.86        |
|          | Br      | -1    | -0.78           | -0.65         | -0.86        |
| NaI      | Na      | +1    | +0.77           | +0.61         | +0.85        |
|          | I       | -1    | -0.77           | -0.61         | -0.85        |
| KF       | K       | +1    | +0.81           | +0.82         | +0.85        |
|          | F       | -1    | -0.81           | -0.82         | -0.85        |
| KCl      | K       | +1    | +0.79           | +0.73         | +0.82        |
|          | Cl      | -1    | -0.79           | -0.73         | -0.82        |
| KBr      | K       | +1    | +0.80           | +0.71         | +0.82        |
|          | Br      | -1    | -0.80           | -0.71         | -0.82        |
| KI       | K       | +1    | +0.80           | +0.67         | +0.81        |
|          | I       | -1    | -0.80           | -0.67         | -0.81        |
| CsF      | Cs      | +1    | +0.87           | +0.87         | +0.91        |
|          | F       | -1    | -0.87           | -0.87         | -0.91        |
| CsCl     | Cs      | +1    | +0.81           | +0.78         | +0.84        |
|          | Cl      | -1    | -0.81           | -0.78         | -0.84        |
| CsBr     | Cs      | +1    | +0.82           | +0.76         | +0.82        |
|          | Br      | -1    | -0.82           | -0.76         | -0.82        |
| CsI      | Cs      | +1    | +0.81           | +0.71         | +0.80        |
|          | I       | -1    | -0.81           | -0.71         | -0.80        |

**Table S2.** Mulliken, Löwdin, and Bader charges of archetypal Zintl phases in comparison with charges expected from the Zintl concept. All charges in units of  $e$ .

| Compound                                                                        | Unit                 | Zintl | Mulliken charge | Löwdin charge | Bader charge |
|---------------------------------------------------------------------------------|----------------------|-------|-----------------|---------------|--------------|
| LiAl                                                                            | Li                   | +1    | +0.50           | +0.60         | +0.83        |
|                                                                                 | Al                   | -1    | -0.50           | -0.60         | -0.83*       |
| LiTl                                                                            | Li                   | +1    | +0.39           | +0.60         | +0.85        |
|                                                                                 | Tl                   | -1    | -0.39           | -0.60         | -0.85        |
| NaTl                                                                            | Na                   | +1    | +0.81           | +0.67         | +0.73        |
|                                                                                 | Tl                   | -1    | -0.81           | -0.67         | -0.73        |
| KTl                                                                             | K                    | +1    | +0.67*          | +0.63*        | +0.66*       |
|                                                                                 | Tl                   | -1    | -0.67*          | -0.63*        | -0.66*       |
| CsTe <sub>4</sub>                                                               | Cs                   | +1    | +0.84           | +0.66         | +0.78        |
|                                                                                 | Te <sub>4</sub> unit | -1    | -0.83           | -0.65         | -0.78        |
| Cs <sub>2</sub> Te <sub>5</sub>                                                 | Cs                   | +1    | +0.83*          | +0.68*        | +0.76*       |
|                                                                                 | Te <sub>5</sub> unit | -2    | -1.67           | -1.36         | -1.51        |
| Cs <sub>2</sub> I <sub>8</sub>                                                  | Cs                   | +1    | +0.90           | +0.70         | +0.85        |
|                                                                                 | I <sub>8</sub> unit  | -2    | -1.82           | -1.40         | -1.69        |
| CaSi                                                                            | Ca                   | +2    | +1.41           | +1.39         | +1.26        |
|                                                                                 | Si                   | -2    | -1.41           | -1.39         | -1.26        |
|                                                                                 | S <sub>8</sub> unit  | +2    | +1.91           | +1.93         | +1.89        |
| S <sub>8</sub> (AsF <sub>6</sub> ) <sub>2</sub>                                 | As                   | +5    | +2.57           | +2.22         | +2.91        |
|                                                                                 | F                    | -1    | -0.59           | -0.54         | -0.64        |
|                                                                                 | Te <sub>6</sub> unit | +4    | +3.48           | +3.48         | +3.70        |
| Te <sub>6</sub> (As(V)F <sub>6</sub> ) <sub>4</sub> ·<br>2As(III)F <sub>3</sub> | As                   | +5/+3 | +2.58/+1.72     | +2.22/+1.49   | +2.91/+1.94  |
|                                                                                 | F                    | -1    | -0.57*          | -0.51*        | -0.64*       |

\*averaged values

**Table S3.** Mulliken and Löwdin charges of the Zintl phase Sr<sub>14</sub>(Al<sub>4</sub>)<sub>2</sub>(Ge)<sub>3</sub> and NFAl<sub>2</sub>Ca<sub>6</sub> in comparison with Zintl and Bader charges. All charges in units of  $e$ .

| Compound                                                           | Element | Zintl | Mulliken charge | Löwdin charge | Bader charge                     |
|--------------------------------------------------------------------|---------|-------|-----------------|---------------|----------------------------------|
| Sr <sub>14</sub> (Al <sub>4</sub> ) <sub>2</sub> (Ge) <sub>3</sub> | Sr      | +2    | +1.23*          | +1.31*        | † (+1.13 to +1.20 <sup>1</sup> ) |
|                                                                    | Al      | -2    | -1.33*          | -1.40*        | † (-1.7 <sup>1</sup> )           |
|                                                                    | Ge      | -4    | -2.23           | -2.40         | † (-2.2 <sup>1</sup> )           |
| NFAl <sub>2</sub> Ca <sub>6</sub>                                  | N       |       | -2.25           | -2.34         | -1.95 (-2.00 <sup>2</sup> )      |
|                                                                    | F       |       | -0.81           | -0.83         | -0.92 (-0.98 <sup>2</sup> )      |
|                                                                    | Al      |       | -2.53           | -2.55         | -2.27 (-2.13 <sup>2</sup> )      |
|                                                                    | Ca      |       | +1.35           | +1.38         | +1.24 (+1.20 <sup>2</sup> )      |

\*averaged values

† calculation still unfinished after more than 23.300 core hours (values in brackets are taken from the literature)

**Table S4.** Mulliken and Löwdin charges of the computational models of stützite. All charges in units of  $e$ .

| Compound                             | Element | Zintl                                                                                                            | Mulliken charge                                      | Löwdin charge                                        |
|--------------------------------------|---------|------------------------------------------------------------------------------------------------------------------|------------------------------------------------------|------------------------------------------------------|
| "Ag <sub>32</sub> Te <sub>21</sub> " | Ag      |                                                                                                                  | +0.26 to +0.43<br>(+0.37*)                           | +0.27 to +0.37<br>(+0.35*)                           |
|                                      | Te      |                                                                                                                  | -0.56 to -0.78/<br>-0.38 to -0.41<br>(-0.66*/-0.40*) | -0.54 to -0.73/<br>-0.34 to -0.37<br>(-0.63*/-0.36*) |
| "Ag <sub>34</sub> Te <sub>21</sub> " | Ag      | (Ag <sup>+</sup> ) <sub>34</sub>                                                                                 | +0.27 to +0.42<br>(+0.36*)                           | +0.28 to +0.36<br>(+0.34*)                           |
|                                      | Te      | (Te <sup>2-</sup> ) <sub>13</sub> ([Te <sup>-</sup> ] <sub>2</sub> ) <sub>4</sub>                                | -0.58 to -0.74/<br>-0.39 to -0.42<br>(-0.68*/-0.36*) | -0.55 to -0.71/<br>-0.35 to -0.39<br>(-0.65*/-0.33*) |
| "Ag <sub>36</sub> Te <sub>21</sub> " | Ag      | (Ag <sup>+</sup> ) <sub>36</sub>                                                                                 | +0.26 to +0.42<br>(+0.33*)                           | +0.27 to +0.35<br>(+0.31*)                           |
|                                      | Te      | (Te <sup>2-</sup> ) <sub>13</sub> ([Te <sup>-</sup> ] <sub>2</sub> ) <sub>4</sub> (e <sup>-</sup> ) <sub>2</sub> | -0.59 to -0.69/-0.42<br>(-0.64*/-0.42)               | -0.57 to -0.67/<br>-0.39 to -0.40<br>(-0.63*/-0.39*) |

\*averaged values

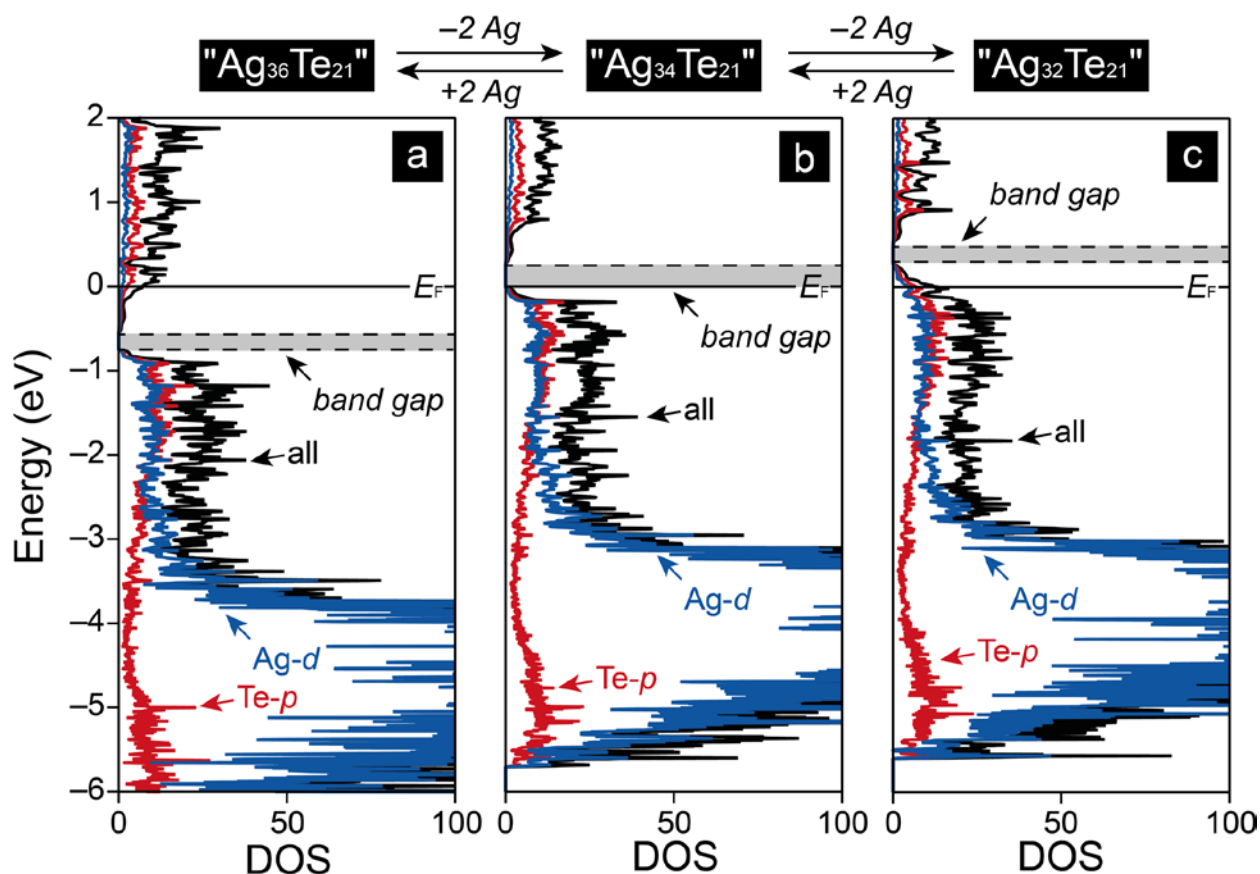

**Figure S1.** Density of states (DOS) of the three models of stützite "Ag<sub>32</sub>Te<sub>21</sub>" (a), "Ag<sub>34</sub>Te<sub>21</sub>" (b), and "Ag<sub>36</sub>Te<sub>21</sub>" (c).<sup>3</sup> Adapted with permission from Ref. 3. Copyright (2018) American Chemical Society.

**Table S5.** Mulliken charges on the hydrogens of a ten-electron series (CH<sub>4</sub>, NH<sub>3</sub>, H<sub>2</sub>O, HF). Comparison between results from the literature<sup>4</sup> and LOBSTER as well as Gaussian<sup>5</sup>. All charges in units of *e*.

| Compound         | Basis set/method | Mulliken charge on hydrogen obtained from a) or b) | Mulliken charge on hydrogen calculated with Gaussian <sup>5</sup> |
|------------------|------------------|----------------------------------------------------|-------------------------------------------------------------------|
| CH <sub>4</sub>  | STO-3G           | 0.06 <sup>a)</sup>                                 | 0.07                                                              |
|                  | 4-31G            | 0.15 <sup>a)</sup>                                 | 0.15                                                              |
|                  | 6-31G*           | 0.16 <sup>a)</sup>                                 | 0.18                                                              |
|                  | 6-31G**          | 0.12 <sup>a)</sup>                                 | 0.18                                                              |
|                  | LDA              | 0.23 <sup>b)</sup>                                 | 0.22                                                              |
| NH <sub>3</sub>  | STO-3G           | 0.16 <sup>a)</sup>                                 | 0.16                                                              |
|                  | 4-31G            | 0.30 <sup>a)</sup>                                 | 0.30                                                              |
|                  | 6-31G*           | 0.33 <sup>a)</sup>                                 | 0.36                                                              |
|                  | 6-31G**          | 0.26 <sup>a)</sup>                                 | 0.35                                                              |
|                  | LDA              | 0.36 <sup>b)</sup>                                 | 0.36                                                              |
| H <sub>2</sub> O | STO-3G           | 0.18 <sup>a)</sup>                                 | 0.19                                                              |
|                  | 4-31G            | 0.39 <sup>a)</sup>                                 | 0.40                                                              |
|                  | 6-31G*           | 0.43 <sup>a)</sup>                                 | 0.46                                                              |
|                  | 6-31G**          | 0.34 <sup>a)</sup>                                 | 0.44                                                              |
|                  | LDA              | 0.41 <sup>b)</sup>                                 | 0.44                                                              |
| HF               | STO-3G           | 0.21 <sup>a)</sup>                                 | 0.23                                                              |
|                  | 4-31G            | 0.48 <sup>a)</sup>                                 | 0.47                                                              |
|                  | 6-31G*           | 0.52 <sup>a)</sup>                                 | 0.51                                                              |
|                  | 6-31G**          | 0.40 <sup>a)</sup>                                 | 0.50                                                              |
|                  | LDA              | 0.65 <sup>b)</sup>                                 | 0.49                                                              |

- a) Values taken from A. Szabo and N. S. Ostlund, *Modern Quantum Chemistry - Introduction to Advanced Electronic Structure Theory*, Dover Publications, Inc.: Mineola, New York, 1996 (Ref. <sup>4</sup>)  
b) As calculated with LOBSTER.

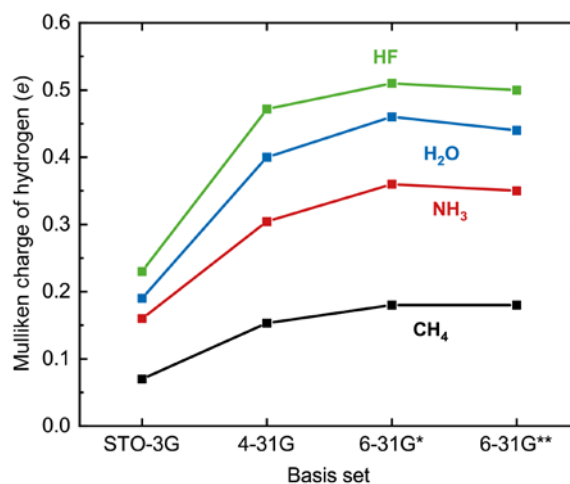

**Figure S2.** Mulliken charges for the ten-electron series (CH<sub>4</sub>, NH<sub>3</sub>, H<sub>2</sub>O, HF) as obtained from Hartree–Fock calculations using Gaussian<sup>5</sup>.

**Table S6.** Lattice parameters and **k**-point mesh for every compound presented in this work.

| Compound                                                                        | Experimental lattice parameter<br>( <i>a</i> , <i>b</i> , <i>c</i> /Å) | Calculated lattice<br>parameter<br>( <i>a</i> , <i>b</i> , <i>c</i> /Å)                                                  | <b>k</b> -point mesh |
|---------------------------------------------------------------------------------|------------------------------------------------------------------------|--------------------------------------------------------------------------------------------------------------------------|----------------------|
| NaF                                                                             | 4.6354(6) <sup>6</sup>                                                 | 4.68                                                                                                                     | 13×13×13             |
| NaCl                                                                            | 5.6573(7) <sup>7</sup>                                                 | 5.69                                                                                                                     | 11×11×11             |
| NaBr                                                                            | 5.9738(7) <sup>8</sup>                                                 | 6.04                                                                                                                     | 11×11×11             |
| NaI                                                                             | 6.479 <sup>9</sup>                                                     | 6.54                                                                                                                     | 11×11×11             |
| KF                                                                              | 5.367(10) <sup>10</sup>                                                | 5.41                                                                                                                     | 11×11×11             |
| KCl                                                                             | 6.2849(5) <sup>7</sup>                                                 | 6.38                                                                                                                     | 11×11×11             |
| KBr                                                                             | 6.5847(7) <sup>11</sup>                                                | 6.71                                                                                                                     | 11×11×11             |
| KI                                                                              | 7.0491(7) <sup>11</sup>                                                | 7.19                                                                                                                     | 9×9×9                |
| CsF                                                                             | 6.03 <sup>12</sup>                                                     | 6.11                                                                                                                     | 11×11×11             |
| CsCl                                                                            | 4.126 <sup>13</sup>                                                    | 4.21                                                                                                                     | 15×15×15             |
| CsBr                                                                            | 4.296992(9) <sup>14</sup>                                              | 4.39                                                                                                                     | 13×13×13             |
| CsI                                                                             | 4.56772(2) <sup>15</sup>                                               | 4.67                                                                                                                     | 13×13×13             |
| LiAl                                                                            | 6.3667(5) <sup>16</sup>                                                | 6.35                                                                                                                     | 9×9×9                |
| LiTl                                                                            | 3.438(2) <sup>17</sup>                                                 | 3.48                                                                                                                     | 17×17×17             |
| NaTl                                                                            | 7.488(3) <sup>18</sup>                                                 | 7.67                                                                                                                     | 9×9×9                |
| KTl                                                                             | 15.329(4), 15.069(4), 8.137(2) <sup>19</sup>                           | 15.99, 15.69, 8.10                                                                                                       | 3×3×7                |
| CsTe <sub>4</sub>                                                               | 7.857(1), 7.286(1), 14.155(2) <sup>20</sup>                            | 8.16, 7.36, 14.30                                                                                                        | 7×9×5                |
| Cs <sub>2</sub> Te <sub>5</sub>                                                 | 9.373(3), 12.288(2), 10.140(2) <sup>21</sup>                           | 9.71, 12.34, 10.34                                                                                                       | 7×5×5                |
| Cs <sub>2</sub> I <sub>8</sub>                                                  | 11.19(5), 9.00(4), 10.23(5) <sup>22</sup>                              | 11.67, 9.17, 10.76                                                                                                       | 5×7×5                |
| CaSi                                                                            | 4.5516(2), 10.7002(4), 3.8869(1) <sup>23</sup>                         | 4.54, 10.76, 3.90                                                                                                        | 13×5×15              |
| S <sub>8</sub> (AsF <sub>6</sub> ) <sub>2</sub>                                 | 15.005(5), 13.401(5), 16.489(5) <sup>24</sup>                          | 15.58, 13.67, 16.57                                                                                                      | 5×5×3                |
| Te <sub>6</sub> (As(V)F <sub>6</sub> ) <sub>4</sub> ·<br>2As(III)F <sub>3</sub> | 14.832, 12.242, 15.301 <sup>25</sup>                                   | 15.35, 12.60, 15.63                                                                                                      | 5×5×5                |
| Sr <sub>14</sub> (Al <sub>4</sub> ) <sub>2</sub> (Ge) <sub>3</sub>              | 11.9658(2), 11.9658(2),<br>40.1033(7) <sup>1</sup>                     | 12.00, 12.00, 40.09                                                                                                      | 7×7×3                |
| NFA <sub>12</sub> Ca <sub>6</sub>                                               | 9.85540512 or<br>6.96882379 (primitive cell) <sup>2</sup>              | 6.97 (primitive cell)<br>13.57, 13.55, 8.40<br>(Ag <sub>32</sub> Te <sub>21</sub> )                                      | 10×10×10             |
| Ag <sub>5-x</sub> Te <sub>3</sub>                                               | 13.4761(11), 13.4761(11),<br>8.4769(7) <sup>3</sup>                    | 13.65, 13.65, 8.53<br>(Ag <sub>34</sub> Te <sub>21</sub> )<br>13.81, 13.81, 8.51<br>(Ag <sub>36</sub> Te <sub>21</sub> ) | 5×5×7                |

**Table S7.** Comparison of core hours (h) and resource consumption (memory usage in GB) between the calculation of charges with Bader (B) and LOBSTER (L). Memory only refers to the memory usage of the VASP calculation.

| Compound                                                                        | B (h)   | L (h)  | Ratio B/L | B (GB) | L (GB) | Ratio B/L |
|---------------------------------------------------------------------------------|---------|--------|-----------|--------|--------|-----------|
| NaF                                                                             | 14.2    | 3.9    | 3.7       | 0.23   | 0.63   | 0.4       |
| NaCl                                                                            | 10.8    | 11.3   | 1.0       | 0.24   | 0.43   | 0.6       |
| NaBr                                                                            | 14.6    | 5.6    | 2.6       | 0.34   | 0.87   | 0.4       |
| NaI                                                                             | 18.3    | 6.0    | 3.0       | 0.41   | 1.04   | 0.4       |
| KF                                                                              | 10.8    | 4.0    | 2.7       | 0.26   | 0.69   | 0.4       |
| KCl                                                                             | 23.9    | 6.5    | 3.7       | 0.39   | 0.99   | 0.4       |
| KBr                                                                             | 30.9    | 8.2    | 3.8       | 0.44   | 1.12   | 0.4       |
| KI                                                                              | 27.3    | 4.9    | 5.5       | 0.35   | 0.81   | 0.4       |
| CsF                                                                             | 14.2    | 6.8    | 2.1       | 0.35   | 0.92   | 0.4       |
| CsCl                                                                            | 3.9     | 1.1    | 3.4       | 0.23   | 0.43   | 0.5       |
| CsBr                                                                            | 2.6     | 0.8    | 3.2       | 0.19   | 0.58   | 0.3       |
| CsI                                                                             | 3.9     | 1.0    | 4.1       | 0.22   | 0.63   | 0.4       |
| LiAl                                                                            | 10.0    | 47.2   | 0.2       | 0.21   | 0.68   | 0.3       |
| LiTl                                                                            | 1.3     | 2.5    | 0.5       | 0.25   | 0.91   | 0.3       |
| NaTl                                                                            | 89.4    | 144.9  | 0.6       | 0.54   | 0.97   | 0.6       |
| KTl                                                                             | 796.6   | 32.6   | 24.5      | 1.19   | 1.51   | 0.8       |
| CsTe <sub>4</sub>                                                               | 95.9    | 25.6   | 3.7       | 1.27   | 1.12   | 1.1       |
| Cs <sub>2</sub> Te <sub>5</sub>                                                 | 154.9   | 28.5   | 5.4       | 0.93   | 1.13   | 0.8       |
| Cs <sub>2</sub> I <sub>8</sub>                                                  | 102.8   | 20.7   | 5.0       | 0.99   | 0.84   | 1.2       |
| CaSi                                                                            | 15.7    | 4.6    | 3.4       | 0.62   | 0.70   | 0.9       |
| S <sub>8</sub> (AsF <sub>6</sub> ) <sub>2</sub>                                 | 14220.1 | 697.1  | 20.4      | 3.99   | 1.42   | 2.8       |
| Te <sub>6</sub> (As(V)F <sub>6</sub> ) <sub>4</sub> ·<br>2As(III)F <sub>3</sub> | 14246.4 | 1163.7 | 12.2      | 7.23   | 2.57   | 2.8       |
| Sr <sub>14</sub> (Al <sub>4</sub> ) <sub>2</sub> (Ge) <sub>3</sub>              | †       | 8454.9 | –         | †      | 5.59   | –         |
| NFAI <sub>2</sub> Ca <sub>6</sub>                                               | 102.3   | 49.5   | 2.1       | 4.23   | 0.56   | 7.6       |
| average                                                                         |         |        | 5.1       |        |        | 1.1       |

† calculation still unfinished after more than 23.300 core hours

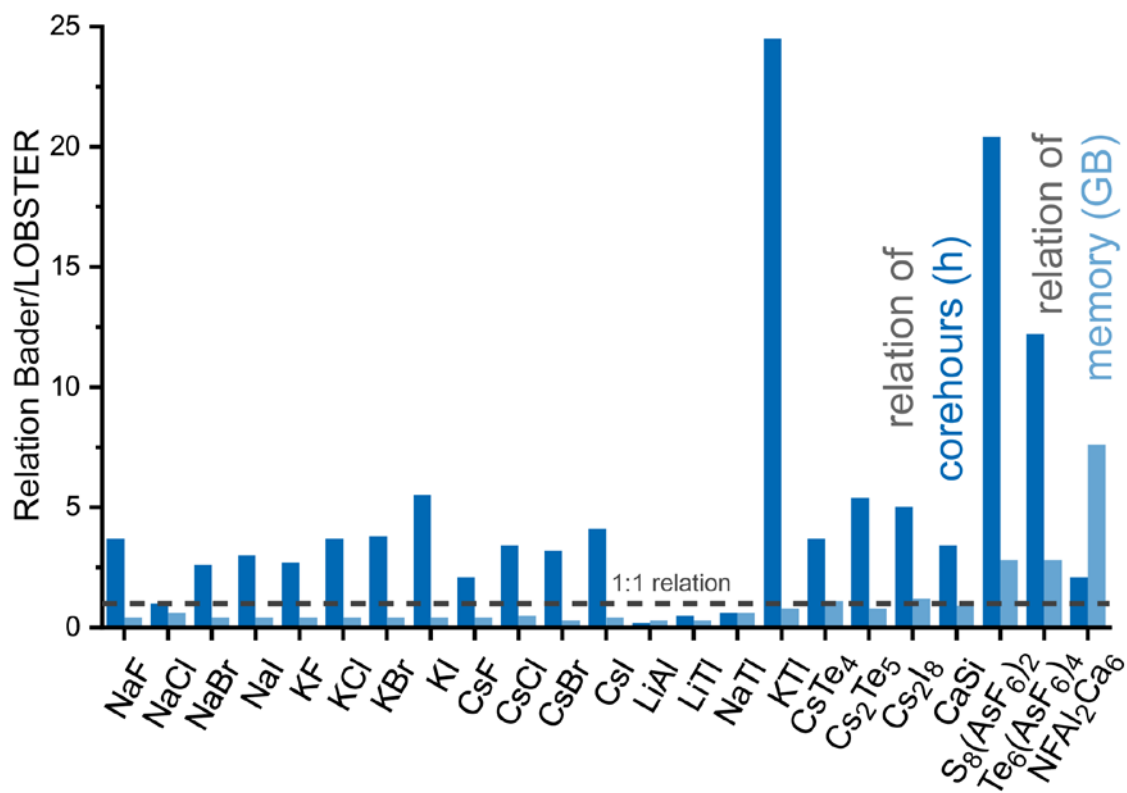

**Figure S3.** Graphical representation of the relation of time and memory consumption of the Bader versus LOBSTER calculations (values correspond to the “ratio” columns in Tab. S7).



**Table S8.** Detailed listing of the number of core hours for LOBSTER and Bader calculations as required by VASP; because the Bader calculations themselves never took longer than 5 s, this time has been safely neglected in the computation time.

| Compound                                                           | VASP comp. time<br>for LOBSTER (h) | LOBSTER comp.<br>time (h) | VASP comp. time<br>for Bader (h) |
|--------------------------------------------------------------------|------------------------------------|---------------------------|----------------------------------|
| NaF                                                                | 3.8                                | 0.1                       | 14.2                             |
| NaCl                                                               | 11.3                               | 0.1                       | 10.8                             |
| NaBr                                                               | 5.5                                | 0.1                       | 14.6                             |
| NaI                                                                | 5.8                                | 0.1                       | 18.3                             |
| KF                                                                 | 3.9                                | 0.1                       | 10.8                             |
| KCl                                                                | 6.4                                | 0.2                       | 23.9                             |
| KBr                                                                | 8.0                                | 0.2                       | 30.9                             |
| KI                                                                 | 4.8                                | 0.1                       | 27.3                             |
| CsF                                                                | 6.7                                | 0.1                       | 14.2                             |
| CsCl                                                               | 1.1                                | 0.04                      | 3.9                              |
| CsBr                                                               | 0.8                                | 0.03                      | 2.6                              |
| CsI                                                                | 0.9                                | 0.03                      | 3.9                              |
| LiAl                                                               | 46.8                               | 0.3                       | 10.0                             |
| LiTl                                                               | 2.0                                | 0.5                       | 1.3                              |
| NaTl                                                               | 143.3                              | 1.7                       | 89.4                             |
| KTl                                                                | 22.8                               | 9.7                       | 796.6                            |
| CsTe <sub>4</sub>                                                  | 24.9                               | 0.7                       | 95.9                             |
| Cs <sub>2</sub> Te <sub>5</sub>                                    | 27.5                               | 1.0                       | 154.9                            |
| Cs <sub>2</sub> I <sub>8</sub>                                     | 20.3                               | 0.4                       | 102.8                            |
| CaSi                                                               | 4.0                                | 0.6                       | 15.7                             |
| S <sub>8</sub> (AsF <sub>6</sub> ) <sub>2</sub>                    | 670.8                              | 26.2                      | 14220.1                          |
| Te <sub>6</sub> (As(V)F <sub>6</sub> ) <sub>4</sub>                | 1125.1                             | 38.7                      | 14246.4                          |
| 2As(III)F <sub>3</sub>                                             |                                    |                           |                                  |
| Sr <sub>14</sub> (Al <sub>4</sub> ) <sub>2</sub> (Ge) <sub>3</sub> | 8192.0                             | 262.9                     | †                                |
| NFAI <sub>2</sub> Ca <sub>6</sub>                                  | 48.4                               | 1.0                       | 102.3                            |

† calculation still unfinished after more than 23.300 core hours

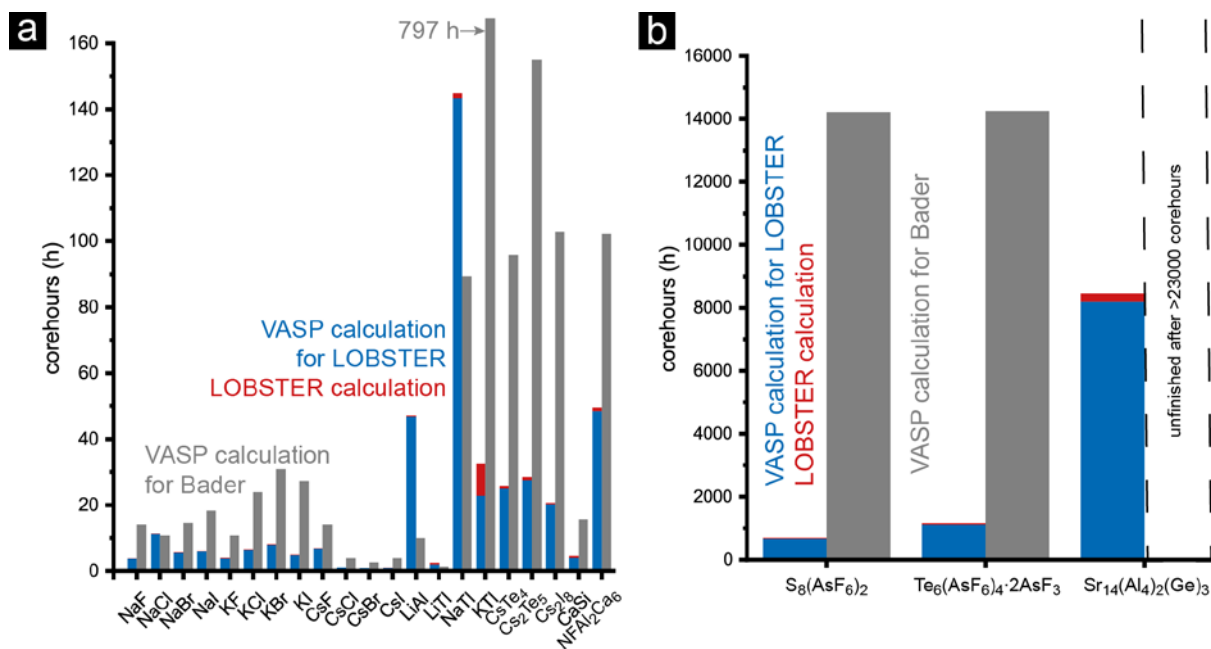

**Figure S4.** Graphical representation of the comparison of core hours for Bader versus LOBSTER calculations showing a) simple and b) complex examples.

## References

1. M. Wendorff and C. Röhr, *Z. Naturforsch.*, 2007, **62b**, 1227–1234.
2. F. A. Faber, A. Lindmaa, O. A. von Lilienfeld and R. Armiento, *Phys. Rev. Lett.*, 2016, **117**, 135502.
3. K. C. Göbgen, F. C. Gladisch and S. Steinberg, *Inorg. Chem.*, 2018, **57**, 412–421.
4. A. Szabo and N. S. Ostlund, *Modern Quantum Chemistry - Introduction to Advanced Electronic Structure Theory*, Dover Publications, Inc.: Mineola, New York, 1996.
5. M. J. Frisch, G. W. Trucks, H. B. Schlegel, G. E. Scuseria, M. A. Robb, J. R. Cheeseman, G. Scalmani, V. Barone, G. A. Petersson, H. Nakatsuji, X. Li, M. Caricato, A. V. Marenich, J. Bloino, B. G. Janesko, R. Gomperts, B. Mennucci, H. P. Hratchian, J. V. Ortiz, A. F. Izmaylov, J. L. Sonnenberg, Williams, F. Ding, F. Lipparini, F. Egidi, J. Goings, B. Peng, A. Petrone, T. Henderson, D. Ranasinghe, V. G. Zakrzewski, J. Gao, N. Rega, G. Zheng, W. Liang, M. Hada, M. Ehara, K. Toyota, R. Fukuda, J. Hasegawa, M. Ishida, T. Nakajima, Y. Honda, O. Kitao, H. Nakai, T. Vreven, K. Throssell, J. A. Montgomery Jr., J. E. Peralta, F. Ogliaro, M. J. Bearpark, J. J. Heyd, E. N. Brothers, K. N. Kudin, V. N. Staroverov, T. A. Keith, R. Kobayashi, J. Normand, K. Raghavachari, A. P. Rendell, J. C. Burant, S. S. Iyengar, J. Tomasi, M. Cossi, J. M. Millam, M. Klene, C. Adamo, R. Cammi, J. W. Ochterski, R. L. Martin, K. Morokuma, O. Farkas, J. B. Foresman and D. J. Fox, *Gaussian 09, Revision D.01*, Gaussian, Inc., Wallingford CT, 2016.
6. Y. Shirako, Y. G. Shi, A. Aimi, D. Mori, H. Kojitani, K. Yamaura, Y. Inaguma and M. Akaogi, *J. Solid State Chem.*, 2012, **191**, 167–174.
7. V. L. Cherginets, V. N. Baumer, S. S. Galkin, L. V. Glushkova, T. P. Rebrova and Z. V. Shtitelman, *Inorg. Chem.*, 2006, **45**, 7367–7371.
8. J. E. Nickels, M. A. Fineman and W. E. Wallace, *J. Phys. Chem.*, 1949, **53**, 625–628.
9. H. E. Swanson, E. Posnjak and R. W. G. Wyckoff, *Natl. Bur. Stand. (U.S.) Circ.*, 1955, **539**, 31–32.
10. G. J. Finch and S. Fordham, *Proc. Phys. Socs, London*, 1936, **48**, 85–94.
11. M. Ahte, *Ann. Acad. Sci. Fenn. Ser. A6*, 1969, **313**, 1–11.
12. E. Posnjak and R. W. G. Wyckoff, *J. Wash. Acad. Sci.*, 1922, **12**, 248–251.
13. V. Ganesan, *Pramana - J. Phys.*, 1986, **27**, 469–474.
14. A. Demont, C. Prestipino, O. Hernandez, E. Elkaim, S. Paofai, N. Naumov, B. Fontaine, R. Gautier and S. Cordier, *Chem. Eur. J.*, 2013, **19**, 12711–12719.
15. A. Smakula and J. Kalnajs, *Phys. Rev.*, 1955, **99**, 1737–1743.
16. K. Kishio and J. O. Brittain, *J. Phys. Chem. Solids*, 1979, **40**, 933–940.
17. W. Baden, P. C. Schmidt and A. Weiss, *Phys. Stat. Sol. (a)*, 1979, **51**, 183–190.
18. E. Zintl and W. Dullenkopf, *Z. Phys. Chem.*, 1932, **16**, 195–205.
19. F. Wang and G. J. Miller, *Inorg. Chem.*, 2011, **50**, 7625–7636.
20. P. Böttcher and U. Kretschmann, *Z. anorg. allg. Chem.*, 1985, **523**, 145–152.
21. P. Böttcher and U. Kretschmann, *Z. anorg. allg. Chem.*, 1982, **491**, 39–46.
22. E. E. Havinga, Diss. Univ. Groningen (Holland), 1957.
23. I. M. Kurylyshyn, T. F. Fässler, A. Fischer, C. Hauf, G. Eickerling, M. Presnitz and W. Scherer, *Angew. Chem. Int. Ed.*, 2014, **53**, 3029–3032.
24. C. G. Davies, R. J. Gillespie, J. J. Park and J. Passmore, *Inorg. Chem.*, 1971, **10**, 2781–2784.
25. R. C. Burns, D. R. Slim, R. J. Gillespie and W. C. Luk, *Inorg. Chem.*, 1979, **18**, 3086–3094.
